1           **Identification of Gli1 as a progenitor cell marker for meniscus**

2                           **development and injury repair**

3       Yulong Wei<sup>1,2\*</sup>, Hao Sun<sup>1,3\*</sup>, Tao Gui<sup>1,4\*</sup>, Lutian Yao<sup>1</sup>, Leilei Zhong<sup>1</sup>, Wei Yu<sup>1,2</sup>, Su-Jin  
4       Heo<sup>1,5</sup>, Lin Han<sup>6</sup>, X. Sherry Liu<sup>1</sup>, Yeji Zhang<sup>1,5,7</sup>, Eiki Koyama<sup>8</sup>, Fanxin Long<sup>8</sup>, Miltiadis  
5                           Zgonis<sup>1</sup>, Robert L Mauck<sup>1,5</sup>, Jaimo Ahn<sup>1</sup>, Ling Qin<sup>1#</sup>

6       <sup>1</sup>Department of Orthopaedic Surgery, Perelman School of Medicine, University of  
7       Pennsylvania, Philadelphia, PA 19104, USA

8       <sup>2</sup>Department of Orthopaedics, Union Hospital, Tongji Medical College, Huazhong  
9       University of Science and Technology, Wuhan 430022, China.

10      <sup>3</sup>Department of Orthopedics, Sun Yat-Sen Memorial Hospital, Guangzhou, China.

11      <sup>4</sup>Department of Bone and Joint Surgery, Institute of Orthopedic Diseases, The First  
12      Affiliated Hospital, Jinan University, Guangzhou, Guangdong, China.

13      <sup>5</sup>Translational Musculoskeletal Research Center, Corporal Michael J. Crescenz VA  
14      Medical Center, Philadelphia, PA, USA

15      <sup>6</sup>School of Biomedical Engineering, Science and Health Systems, Drexel University,  
16      Philadelphia, PA 19104, USA

17      <sup>7</sup>Department of Physical Medicine and Rehabilitation, Perelman School of Medicine,  
18      University of Pennsylvania, Philadelphia, PA 19104, USA

19      <sup>8</sup>Translational Research Program in Pediatric Orthopaedics, The Children's Hospital of  
20      Philadelphia, Philadelphia, PA 19104, USA

21      \* These authors contributed equally to this article.

22      # Corresponding author: Ling Qin, Department of Orthopaedic Surgery, Perelman School  
23      of Medicine, University of Pennsylvania, 311A Stemmler Hall, 36th Street and Hamilton

24 Walk, Philadelphia, PA 19104, USA

25 Tel: 215-8986697; Fax: 215-5732133; email: [qinling@pennmedicine.upenn.edu](mailto:qinling@pennmedicine.upenn.edu)

26 **Running title:** Identifying Gli1 as a meniscal progenitor marker.

27

28 **Competing interests:** None declared.

29 **Keywords:** Gli1, mesenchymal progenitor, lineage tracing, meniscus injury, osteoarthritis

30 **Abstract**

31 Meniscal tears are associated with a high risk of osteoarthritis but currently have no  
32 disease-modifying therapies. Using Gli1-CreER tdTomato mice, we found that Gli1+  
33 cells contribute to the development of meniscus horns from 2 weeks of age. In adult  
34 mice, Gli1+ cells resided at the superficial layer of meniscus and expressed known  
35 mesenchymal progenitor markers. In culture, meniscal Gli1+ cells possessed high  
36 progenitor activities under the control of Hh signal. Meniscus injury at the anterior horn  
37 induced a quick expansion of Gli1+ cells. Normally, the tissue healed slowly, leading to  
38 cartilage degeneration. Ablation of Gli1+ cells further hindered this repair process.  
39 Strikingly, intra-articular injection of Gli1+ meniscal cells or an Hh activator right after  
40 injury accelerated the bridging of the interrupted ends and attenuated signs of  
41 osteoarthritis. Taken together, our work identified a novel progenitor population in  
42 meniscus and proposes a new treatment for repairing injured meniscus and preventing  
43 osteoarthritis.

44

45

46

47

48

49

50

51

## 52 **Introduction**

53 Meniscal tears, with all the morbidity and disability they cause, are among the most  
54 common injuries of the knee affecting both the young and aged; and the procedures to  
55 address them are among the most commonly performed surgeries in the orthopedics field.  
56 Beyond the short-term pain, disability, time from desired activities including work,  
57 meniscal injuries are important early events in the initiation and later propagation of  
58 osteoarthritis (OA) [1]. From a clinical therapeutic point of view, surgical treatments,  
59 including the maximally preserving partial meniscectomy, while improving immediate  
60 symptoms, do not delay the natural history progression of OA or may actually accelerate  
61 it. As the adult meniscus is predominantly avascular, true biologic healing with surgical  
62 repair remains a viable treatment for only a small portion of individuals typically with  
63 tears contained within the red vascular zone [2]. For the majorities of injuries, a  
64 restorative biologic therapy does not currently exist in practice.

65 Mesenchymal progenitors play a critical role in tissue regeneration. Therefore,  
66 identifying and characterizing residential mesenchymal progenitors in meniscus are  
67 important for developing novel and effective strategies to treat meniscus injury. Using  
68 enzymatic digestion and clonal expansion methods, previous studies have demonstrated  
69 that human and rabbit meniscus contain mesenchymal progenitors with multi-  
70 differentiation abilities [3-6]. Interestingly, the superficial layer of meniscus was  
71 proposed to harbor the progenitors. By collecting cells growing out of mouse meniscus  
72 explant, Gamer et al. showed that these cells exhibit stem cell-like characteristic and are  
73 located in the superficial zone in vivo [7]. During injury, it has been observed that  
74 progenitors on the meniscus surface migrate from vascularized red zone to non-



75 vascularized white zone for repair [8]. While these cells in culture express several  
76 common mesenchymal progenitor markers, such as CD44, Sca1, and CD90, their in vivo  
77 properties and regulatory signaling pathways are not known [6, 8].

78 Hedgehog (Hh) signaling is essential for embryonic development and tissue  
79 homeostasis. It is one of few fundamental pathways that maintain adult stem and  
80 progenitor cells in various organs, such as brain, skin, bladder, teeth, and others [9].  
81 Following injury, Hh signaling can trigger stem and other resident cells to participate in  
82 repair, and therefore, Hh upregulation is viewed not only as a natural response to injury  
83 but also as a way to stimulate tissue repair by activating stem cells. Gli1, an integral  
84 effector protein of Hh pathway, was recently recognized as a marker for bone marrow,  
85 periosteal, and periarticular mesenchymal progenitors [10-12], suggesting that Hh  
86 signaling is also functional in skeleton for maintaining tissue-specific stem and  
87 progenitors.

88 In this study, we constructed a Hh reporter mouse (*Gli1-CreER Tomato, Gli1<sup>ER/Td</sup>*),  
89 and found that Gli1-labeled Td<sup>+</sup> cells are exclusively located in the horns of adolescent  
90 meniscus. These cells contribute to meniscus development and possess mesenchymal  
91 progenitor properties. In adult mice, Gli1<sup>+</sup> cells mostly reside at the superficial layer of  
92 meniscus and they rarely become cells in the center of meniscus. Interestingly, meniscus  
93 injury induced a rapid expansion of Gli1<sup>+</sup> cells and elimination of these cells mitigated  
94 repair. Using sorted Gli1-labeled cells and a Gli1 activator, we demonstrated that  
95 activating Hh signaling could be an effective way to promote meniscus repair and prevent  
96 OA progression.

97

98 **Materials and Methods**

99 **Animals.** All animal work performed in this report was approved by the Institutional  
100 Animal Care and Use Committee (IACUC) at the University of Pennsylvania. *Gli1-*  
101 *CreER Rosa-tdTomato (Gli1ER/Td)* mice were generated by breeding *Gli1-CreER* mice  
102 (Jackson Laboratory, Bar Harbor, ME USA) with *Rosa-tdTomato* mice (Jackson  
103 Laboratory). They were further bred with *Rosa-DTA* mice (Jackson Laboratory) to  
104 produce *Gli1-CreER Rosa-tdTomato Rosa-DTA (Gli1ER/Td/DTA)*. In accordance with the  
105 standards for animal housing, mice were group housed at 23-25°C with a 12 h light/dark  
106 cycle and allowed free access to water and standard laboratory pellets. All animal work  
107 performed in this report was approved by the Institutional Animal Care and Use  
108 Committee (IACUC) at the University of Pennsylvania.

109 To induce Td expression or ablate Gli1-labeled cells, mice (*Gli1ER/Td* or  
110 *Gli1ER/Td/DTA*) received vehicle or Tamoxifen (Tam) injections at 50 mg/kg at P4 and  
111 P5 or 75 mg/kg for 5 days at ages older than 1 week. For EdU labeling of proliferation  
112 experiment, mice were injected with daily 1.6 mg/kg EdU (Invitrogen, Carlsbad, USA,  
113 A10044) for 4 days before harvesting. For EdU labeling of slow-cycling experiment,  
114 mice were injected with daily 5 mg/kg EdU for 4 days at P3-6.

115 Male mice at 3 months of age were subjected to meniscus injury at right knees. To  
116 perform the surgery, the joint capsule was opened immediately after anesthesia and the  
117 anteriomedial horn of meniscus were cut into two parts using microsurgical scissors. The  
118 joint capsule and the subcutaneous layer were then closed with suture followed by skin  
119 closure with tissue adhesive. In sham surgery, meniscus will be visualized but not  
120 transected. For cell treatment, cells digested from meniscus of *Gli1ER/Td* mice were

121 sorted by FACS to collect Td<sup>+</sup> and Td<sup>-</sup> cells. 10,000 cells were injected into the knee joint  
122 space of sibling *WT* mice immediately after meniscus surgery. For activator treatment, 2  
123  $\mu$ l purmorphamine (100  $\mu$ M) were injected into the knee joint space of *WT* or *Gli1ER/Td*  
124 mice immediately after surgery. Mice were euthanized at indicated time points for  
125 histology analysis.

126 The knee joint pain after meniscus injury was evaluated in mice at 1 month after  
127 surgery using von Frey filaments as described previously [13]. An individual mouse was  
128 placed on a wire-mesh platform (Excellent Technology Co.) under a 4×3×7 cm cage to  
129 restrict their move. Mice were trained to be accustomed to this condition every day  
130 starting from 7 days before the test. During the test, a set of von Frey fibers (Stoelting  
131 Touch Test Sensory Evaluator Kit #2 to #9; ranging from 0.015 to 1.3 g force) were  
132 applied to the plantar surface of the hind paw until the fibers bowed, and then held for 3  
133 seconds. The threshold force required to elicit withdrawal of the paw (median 50%  
134 withdrawal) was determined five times on each hind paw with sequential measurements  
135 separated by at least 5 min.

136 To induce OA, male mice at 3 months of age were subjected to DMM surgery at right  
137 knees and sham surgery at left knees as described previously [14]. Briefly, in DMM  
138 surgery, the joint capsule was opened immediately after anesthesia and the medial  
139 meniscotibial ligament was cut to destabilize the meniscus without damaging other  
140 tissues. In sham surgery, the joint capsule was opened in the same fashion but without  
141 any further damage.

142 **Human and Mini-pig Meniscus Samples.** The meniscus samples were prepared from  
143 the de-identified specimens obtained at the total arthroplasty of the knee joints and used

144 for histological and immunohistochemical examination. The meniscus degeneration  
145 severity was evaluated according to the meniscus surface including lamellar layer,  
146 cellularity, collagen organization and safranin O/fast green staining [15]. 6-month-old  
147 male Yucatan minipigs were utilized (Sinclair Bioresources) to provide meniscus tissues.  
148 Anterior horn meniscus tissue was obtained for following histological analysis.

149 **Histology.** After euthanasia, mouse knee joints were harvested and fixed in 4% PFA  
150 overnight followed by decalcification in 10% M EDTA (pH 7.4). Samples were processed  
151 for either cryosections after 1 week of decalcification or paraffin sections after 4 weeks of  
152 decalcification. For healthy knee joints, a serial of 6  $\mu\text{m}$ -thick sections were cut across  
153 the entire compartment of the joint at the coronal or sagittal plane followed by fluorescent  
154 imaging (cryosections) or safranin O/fast green staining for brightfield imaging (paraffin  
155 sections). For meniscus injured knee joints, a serial of 6  $\mu\text{m}$ -thick sections were cut  
156 across the entire anterior horn area in the direction perpendicular to the meniscus injury  
157 gap (oblique sections) followed by fluorescent imaging (cryosections) or safranin O/fast  
158 green staining for brightfield imaging (paraffin sections). To evaluate meniscus healing  
159 process, we collected all sections (~15) including both synovial and ligamental ends.  
160 Three sections were selected from each knee, corresponding to 1/3 (sections 1-5), 2/3  
161 (sections 6-10), and 3/3 (sections 11-15) regions of the entire section set to quantify the  
162 meniscus repair scores according to the connection between two ends, existence of  
163 fibrochondrocyte and sensitivity of safranin O staining [16]. The method to measure  
164 Mankin Score was described previously [17]. Briefly, two sections within every  
165 consecutive six sections in the entire sagittal section set for each knee were stained with  
166 safranin O/fast green and scored by two blinded observers (YW and HS). Each knee

167 received a single score representing the maximal score of its sections.

168 For immunohistochemistry staining, mouse, porcine, and human paraffin sections were  
169 incubated with rabbit anti-Gli1 (NOVUS biologicals, NB600-600) and anti-Ki67  
170 (Abcam, ab15580) at 4°C overnight followed by binding with biotinylated secondary  
171 antibody incubation for 1h and DAB color development. For immunofluorescence  
172 staining, sagittal knee joint cryosections from 12-week-old Gli1ER/Td mice were  
173 incubated with rat anti-sca1 (Santa cruz, sc-52601), rat anti-Cd200 (Santa cruz, sc-  
174 53100), mouse anti-Cd90 (Santa cruz, sc-53456), mouse anti-PDGFR $\alpha$  (Santa cruz, sc-  
175 398206), mouse anti-Cd248 (Santa cruz, sc-377221), rabbit anti-Prg4 (Abcam, ab28484)  
176 at 4°C overnight followed by binding with corresponding Alexa Fluor® 488-conjugated  
177 secondary antibody incubation for 2h and DAPI counterstaining.

178 **Primary Mouse Meniscus Cell Culture.** Mouse menisci were dissected from tibiae of  
179 4-week-old mice and digested in 0.25% Trypsin-EDTA (Gibco) for 1 h followed by  
180 300U/mL collagenase type I (Worthington Biochemical) for 2 h. Cells from the second  
181 digestion were cultured in the growth medium ( $\alpha$ MEM supplemented with 10% fetal  
182 bovine serum plus 100 IU/ mL penicillin and 100 mg/mL streptomycin) to obtain  
183 meniscus cell culture. For CFU-F assay, digested cells were seeded at 20,000 cells per  
184 T25 flask. Seven days later, flasks were stained with 3% crystal violet to quantify colony  
185 numbers. To study cell migration, primary meniscus cells were seeded in 12-well plates.  
186 When reaching confluency, the cell layer was scratched by a 1000  $\mu$ L pipette tip and then  
187 cultured in FBS free growth medium. Wound closure was monitored by imaging at 0 and  
188 48 hr later. To study cell proliferation, primary meniscus cells were seeded at 50,000  
189 cells/well in 12-well plates and cell numbers were counted 2, 4, and 6 days later.

190 Chondrogenic, osteogenic, and adipogenic differentiation was performed as describe  
191 previously [12]. For meniscal differentiation, confluent cells were cultured in meniscus  
192 differentiation medium (high glucose DMEM with 100 IU/ mL penicillin, 100 mg/mL  
193 streptomycin, 0.1  $\mu$ M dexamethasone, 50  $\mu$ g/ml ascorbate 2-phosphate, 40  $\mu$ g/ml  
194 l-proline, 100  $\mu$ g/ml sodium pyruvate, 6.25  $\mu$ g/ml insulin, 6.25  $\mu$ g/ml transferrin, 6.25  
195 ng/ml selenous acid, 1.25 mg/ml bovine serum albumin, 5.35  $\mu$ g/ml linoleic acid and 10  
196 ng/ml TGF- $\beta$ 3) as described previously [18, 19].

197 **Flow Cytometry and Cell Sorting.** Flow cytometry and cell sorting were performed on  
198 a FACS Aria III cell sorter (BD Biosciences) and analyzed using Flow Jo software (Tree  
199 Star). Digested meniscus cells were re-suspended in flow buffer (2% FBS/PBS) and  
200 stained with Sca1 (BioLegend, 108131), Cd90 (BioLegend, 202526), Cd200 (BioLegend,  
201 123809), and PDGFR $\alpha$  (BioLegend, 135907) flow antibody for 1 h at 4°C. After PBS  
202 wash, cells were analyzed by flow cytometry or sorted for Gli1<sup>+</sup> and Gli1<sup>-</sup> cells.

203 **RNA Analyses.** To quantify the expression level of marker genes, total RNA was  
204 collected in Tri Reagent (Sigma, St. Louis, MO, USA) for RNA purification. A Taqman  
205 Reverse Transcription Kit (Applied BioSystems, Inc., Foster City, CA, USA) was used to  
206 reverse transcribe mRNA into cDNA. The power SYBR Green PCR Master Mix Kit  
207 (Applied BioSystems, Inc) was used for quantitative real-time PCR (qRT-PCR). The  
208 primer sequences for the genes used in this study are listed in Supplemental Table S1.

209 **Statistical Analyses.** Data are expressed as means  $\pm$  standard error of the mean (SEM)  
210 and analyzed by t-tests, one-way ANOVA with Dunnett's or Turkey's posttest and two-  
211 way ANOVA with Turkey's post-test for multiple comparisons using Prism 8 software  
212 (GraphPad Software, San Diego, CA). For assays using primary cells, experiments were

213 repeated independently at least three times and representative data were shown here.

214 Values of  $p < 0.05$  were considered statistically significant.

215

## 216 **Results**

### 217 **The expression patterns of Gli1<sup>+</sup> cells and their descendants in mouse meniscus.**

218 We performed lineage tracing with *Gli1ER/Td* mice at various ages to identify Gli1<sup>+</sup> cells  
219 and their descendants at 6 weeks later in meniscus (Fig. S1A). Joints were cut at either  
220 sagittal or coronal planes to visualize different parts of meniscus (Fig. S1B). In line with  
221 our previous report [11], at 1 week of age, Gli1<sup>+</sup> cells were only observed in the  
222 periarticular layer of articular cartilage, but not in the meniscus and other joint tissues  
223 (Fig. 1Aa-c). Long term tracing also did not detect any Td signal in the meniscus,  
224 confirming that neonatal meniscus does not harbor Gli1<sup>+</sup> cells (Fig. 1Ad). At 2 weeks of  
225 age, most cells in the anterior horn of the meniscus, both medially and laterally, were Td<sup>+</sup>  
226 (Fig. 1Ae-g). Six weeks of tracing confirmed that the entire anterior horn, but not the  
227 posterior horn, is labeled by Td (Fig. 1Ah). At 4 weeks of age, Gli1<sup>+</sup> cells were  
228 concentrated in the superficial layer of the anterior horn; 6 weeks later, most cells in both  
229 superficial and central portions of the anterior horn were labeled by Td (Fig. 1Ai-l).  
230 Within the posterior horn, very few cells in the center of meniscus were initially labeled  
231 but then gave rise to the majority of internal cells 6 weeks later. Quantification along the  
232 length of the meniscus over the time indicated that 1-8 weeks of age represents the rapid  
233 growing phase for the meniscus (Fig. S2). Taken together, our data suggested that Gli1<sup>+</sup>  
234 cells represent progenitors for meniscus cells of the horn regions at adolescence stage.

235 Starting from 8 weeks of age, Gli1<sup>+</sup> cells were exclusively restricted to the superficial

236 layer of the anterior horn throughout tracing (Fig. 1Am-t). The labeling pattern in the  
237 posterior horn was slightly different that Td<sup>+</sup> cells first appear in the center and then  
238 expand to the entire tissue at 6 weeks later (Fig. 1Am-p). At 12 weeks of age, Gli1<sup>+</sup> cells  
239 remained restricted to the superficial layer of both anterior and posterior horns throughout  
240 tracing (Fig. 1Aq-t). At any given age, Td signal was not detected in the center of the body  
241 of either the medial or lateral meniscus regardless of cutting planes (Fig. 1B).

242 Slow cycling cells are considered quiescent stem cells [20]. Applying a label-retention  
243 method on neonatal mice (EdU injections at P3-6 and Tam injections at P25-29), we  
244 found that Gli1-labeled cells at P30 contain much more EdU<sup>+</sup> cells than non-Gli1-labeled  
245 cells (Fig. 1C, D), indicating that meniscus stem cells are enriched in the Gli1<sup>+</sup> cell  
246 population.

247 When mice reached mature and late adult stages (24 and 48 weeks of age,  
248 respectively), Gli1 mostly marked the superficial layer of both anterior and posterior horn  
249 of the meniscus (Fig. 1E). Quantification of cells along the surface of meniscal horns  
250 revealed a drastic reduction of Gli1<sup>+</sup> cells in aged mice compared to adolescent mice  
251 (Fig. 1F).

252 Meniscus is attached to neighboring bones via fibrocartilaginous entheses. We found  
253 that Gli1 labels these entheses between anteromedial, posteromedial, anterolateral,  
254 posterolateral meniscus and the tibial plateau or femur condyle (Fig. S3A). In addition,  
255 Gli1 also labeled the osseous ligamentous junctions between the anterior cruciate  
256 ligament or posterior cruciate ligament and femur or tibia (Fig. S3B, C).

257 The existence of Gli1-labeled cells on the meniscus surface was confirmed by Gli1  
258 immunostaining (Fig. S4A). Furthermore, analysis of porcine meniscus revealed a similar



259 staining pattern. As shown in Fig. S4B, Gli1<sup>+</sup> cells were located in the superficial layer,  
260 but not in the central part, of meniscus horn in the adult mini-pig.

261 **Gli1-expressing meniscus cells are mesenchymal progenitors.**

262 We next investigated whether Gli1<sup>+</sup> meniscus cells possess mesenchymal progenitor  
263 properties. Immunostaining of mesenchymal markers, such as Sca1, Cd90, Cd200,  
264 PDGFR $\alpha$  [21] and Cd248 [22, 23] revealed their co-staining with Td<sup>+</sup> signal in the  
265 superficial layer of the meniscus in 3-month-old mice (Fig. 2Aa-e). Prg4 is the lubricant  
266 highly synthesized by cartilage, meniscus and synovium surface cells [13, 24]. We found  
267 that Gli1<sup>+</sup> cells are also Prg4<sup>+</sup> (Fig. 2Af). Using an enzymatic digestion approach, we  
268 harvested meniscus cells for subsequent studies. Flow cytometry revealed that Gli1<sup>+</sup> cells  
269 are only 2% of meniscus cells digested from 3-month-old mice and that they express  
270 mesenchymal progenitor markers Sca1, CD90, CD200, and PDGFR $\alpha$  at a higher level  
271 than Gli1<sup>-</sup> cells (Fig. S5, Fig. 2B).

272 Digested meniscus cells formed CFU-Fs in dishes. Interestingly, 72.8% of CFU-Fs  
273 were Td<sup>+</sup>, suggesting that Gli1<sup>+</sup> cells have a high clonogenic activity (Fig. 2C). While  
274 both Td<sup>+</sup> and Td<sup>-</sup> cell can grow in culture, sorted Td<sup>+</sup> cells proliferated faster (Fig. S6A,  
275 B) and migrated quicker (Fig. 2D) than Td<sup>-</sup> cells. In addition, Td<sup>+</sup> meniscus cells had a  
276 better ability to undergo osteogenic, adipogenic, and chondrogenic differentiation than  
277 Td<sup>-</sup> cells in vitro (Fig. 2E). When subjected to meniscal differentiation, Td<sup>+</sup> cells  
278 expressed much more *Colla1*, a meniscal marker, and less *Col2a1* and *Sox9*, two  
279 chondrogenic markers, than Td<sup>-</sup> cells (Fig. 2F). Taken together, these data demonstrated  
280 that Gli1<sup>+</sup> cells possess the properties of mesenchymal progenitors: self-renewal and  
281 multi-lineage differentiation.

282 **Hh signaling regulates cell behavior of meniscus progenitors.**

283 Gli1 expression is a reporter for Hh signaling pathway [25]. To investigate whether Hh  
284 signaling is involved in regulating meniscus progenitors, we treated meniscus progenitors  
285 with purmorphamine, an activator of Hh signaling [26], or Gli antagonist 61 (GANT-61),  
286 a Gli1 inhibitor [27], and performed proliferation, migration, and differentiation assays.  
287 In line with previous reports [28, 29], GANT-61 reduced Gli1 expression in meniscus  
288 progenitors while purmorphamine increased it (Fig. 3A). Cell counting revealed that  
289 GANT-61 reduces the number of meniscus cells in culture over time while  
290 purmorphamine increases cell number (Fig. 3B). Similarly, scratch assay showed that Hh  
291 signaling activation is required for the migration of meniscus progenitors (Fig. 3C, D).  
292 Furthermore, as shown by qRT-PCR, inhibition of Gli1 by GANT-61 reduces *Coll1a1*,  
293 *Col2a1*, and *Sox9* expression and activation of Gli1 by purmorphamine has the opposite  
294 effects during meniscus differentiation (Fig. 3E). To further support the above  
295 proliferation data, purmorphamine up-regulated the expression of cell cycle gene *Ccnd1*  
296 and down-regulates the expression of cell cycle inhibitor *Cdkn2a*, while GANT-61  
297 stimulates the expression of *Cdkn2a* (Fig. 3E). Our data demonstrated an important action  
298 of Hh signaling in promoting proliferation, migration, and differentiation of meniscus  
299 progenitors.

300 **Injury-induced Gli1<sup>+</sup> cell expansion are critical for meniscus healing.**

301 Meniscal tear is a common injury in joints. To mimic this injury, we surgically cut the  
302 anteromedial horn of the meniscus into two parts in 3-month-old mice, resulting in  
303 disconnected synovial and ligamental ends of the meniscus (Fig. S7A). *Gli1<sup>ER</sup>/Td* mice  
304 received Tam right before surgery (Fig. S7B). At 1-2 weeks post-surgery, the two ends of

305 the meniscus retracted toward the synovium and ligament, respectively (Fig. 4Aa-c). This  
306 was accompanied by massive synovial hyperplasia that wrapped around the ends of the  
307 meniscus and likely stabilized them. At 4 weeks, the synovium returned to relatively  
308 normal thickness and the two cut ends of the meniscus were aligned but not connected  
309 (Fig. 4Ad). Over time, the connection between the two ends gradually moved toward re-  
310 establishment but never reached the normal level even after 3 months post surgery (Fig.  
311 4Ae,f). The meniscus repair scores summarized this trend (Fig. 4B), suggesting that  
312 meniscus heals slowly in this injury model.

313 Fluorescence imaging was used to analyze the contribution of Gli1<sup>+</sup> cells and their  
314 descendants during this process. Strikingly, starting from 2 weeks post-injury, Td<sup>+</sup> cells  
315 appeared at the synovial ends and ligamental ends of injured meniscus (Fig. 4Ai). Their  
316 number peaked around 4 weeks, and gradually declined thereafter (Fig. 4Aj-l). Total cell  
317 density and the percentage of Gli1<sup>+</sup> cells at both ends were significantly increased after  
318 injury, particularly at the ligamental end (Fig. 4C). EdU incorporation experiment  
319 confirmed that many Gli1<sup>+</sup> cells and their progenies are proliferative at 2 weeks post  
320 surgery (Fig. 4D). In old mice (52 weeks of age), this expansion of Td<sup>+</sup> cells after injury  
321 was remarkably attenuated and the end-to-end reconnection was much less with a lower  
322 repair score than young adult mice 4 weeks later (Fig. S8A, B), indicating that aging  
323 diminishes the repair ability of meniscus.

324 To further understand the role of Gli1<sup>+</sup> cell expansion in meniscus repair, we generated  
325 *Gli1-CreER Tomato DTA (Gli1<sup>ER</sup>/Td/DTA)* mice for a cell ablation experiment. These  
326 mice at 3 months of age received Tam injections followed by meniscus injury (Fig. 4E).  
327 One day after the Tam injections, Td<sup>+</sup> cells in meniscus were drastically decreased by

328 54.5%, as shown by both sagittal and coronal views of meniscus horns (Fig. 4E). Three  
329 months later, while two meniscus ends loosely reconnected in vehicle-treated mice, those  
330 in Tam-treated mice were still well separated, leading to a significant reduction of repair  
331 score (Fig. 4F). Fluorescence imaging confirmed no more expansion of Td<sup>+</sup> cells in Tam-  
332 treated mice. These data clearly indicate an essential role of Gli1<sup>+</sup> cells in meniscal  
333 healing.

334 To validate our mouse data, we collected healthy and degenerated human meniscus for  
335 immunohistochemistry analysis. Degenerated meniscus had surface disruption, collagen  
336 fibers disorganization, and positive safranin O/fast green staining as previously reported  
337 [15]. Healthy meniscus did not show Gli1 staining (Fig. S9). However, in moderate and  
338 severe degenerated meniscus, Gli1 was readily detectable in cell clusters formed in  
339 various sizes and characterized by Ki67<sup>+</sup> staining, indicating that Gli1<sup>+</sup> cells are  
340 proliferative. These results confirmed an expansion of Gli1<sup>+</sup> cells in human meniscus  
341 tissues and a potential action of Hh signaling in human meniscus repair.

#### 342 **Activation of Hh/Gli1 pathway accelerates mouse meniscus repair.**

343 Since Gli1<sup>+</sup> cells and their descendants were greatly expanded at the early phase of  
344 meniscus injury repair, we hypothesized that activation of Hh/Gli1 pathway could  
345 stimulate the repair process. We adopted two approaches to test this hypothesis. One was  
346 to inject Gli1<sup>+</sup> cells freshly isolated from *Gli1ER/Td* meniscus into injured knees (Fig.  
347 5A). Strikingly, a single injection of cells right after injury resulted in a reconnection of  
348 the synovial and ligamental ends of injured meniscus at 4 weeks, leading to a repair score  
349 of 4.8 (Fig. 5A, B). At the same time, these two meniscus ends were well separated in  
350 both vehicle and Gli1<sup>-</sup> meniscus cell-treated groups, with a repair score of only 1.8 and

351 1.9, respectively. Polarizing images clearly showed a disconnection of collagen fibers in  
352 mice that received either vehicle or Gli1<sup>-</sup> cells. However, in Gli1<sup>+</sup> cell-treated mice,  
353 collagen fibers crossed the broken ends of the meniscus, suggesting that the repair does  
354 occur at the structural level. Fluorescence imaging revealed that injected Gli1<sup>+</sup> cells  
355 expand and contribute to the newly formed connection at the injury site (Fig. 5C).

356 In another approach, we injected purmorphamine to the knee joint right after injury  
357 (Fig. 5D). Four weeks later, the injured ends of purmorphamine-treated meniscus were  
358 reconnected based on gross morphology, safranin O/fast green staining, and imaging of  
359 collagen fibers (Fig. 5D), leading to a repair score of 4.9 (Fig. 5E). There were more Td<sup>+</sup>  
360 meniscus cells in purmorphamine-treated joints than vehicle-treated joints at 1 week after  
361 injury (Fig. 5F). These data clearly indicated a therapeutic effect of activating Hh  
362 signaling.

### 363 **Meniscus repair by enhancing Hh/Gli1 pathway delays OA progression.**

364 Meniscal injury inevitably leads to OA in human. To mimic this in mice, we  
365 characterized articular cartilage phenotype at 8 weeks post injury. Similar to the surgical  
366 destabilization of the medial meniscus (DMM) model of OA, our meniscus injury model  
367 caused cartilage degeneration, such as partially loss of proteoglycan, surface fibrillation,  
368 and reduction in uncalcified cartilage thickness (Fig. 6A, B). Meanwhile, the calcified  
369 cartilage layer was not eroded (Fig. 6B), suggesting a moderate OA with a Mankin Score  
370 of 6.9 (Fig. 6C). Strikingly, injections of either Gli1<sup>+</sup> cells or purmorphamine greatly  
371 reduced cartilage degeneration by retaining proteoglycan content, cartilage surface  
372 smoothness, and the structure of uncalcified cartilage. These treatments led to a reduction  
373 in Mankin Score by 35% and 53%, respectively. Von Frey assay is commonly used in OA

374 study as a pain outcome by evaluating mechanical allodynia. Using this assay, we  
375 observed that OA knees displayed significantly decreased paw withdraw threshold  
376 compared to sham knees. However, this OA-related pain was mostly attenuated in Gli1<sup>+</sup>  
377 cell- or purmorphamine-treated knees (Fig. 6D).

378 Hh signaling has also been indicated to play a role in the development of articular  
379 cartilage [30] and in OA progression [31]. To exclude the possibility that activating Hh  
380 signaling directly affects OA progress, we performed DMM surgery in 3-month-old male  
381 *WT* mice and injected purmorphamine into their knee joints right after surgery. Two  
382 months later, we observed a similar level of cartilage degeneration in control and treated  
383 mice (Fig. 6E, F), suggesting that the effect of Hh signaling on OA development is  
384 mediated through meniscus repair but not through directly acting on cartilage. It is  
385 worthwhile noting that different from our transient activation approaches, the previous  
386 conclusion about the catabolic action of Hh signaling on cartilage is derived from  
387 constant modulation of this signaling by genetic approaches.

388

## 389 **Discussion**

390 Previous studies have identified the existence of mesenchymal progenitors in meniscus  
391 based on their clonogenic and multi-differentiation activities in culture. However, their in  
392 vivo properties and regulatory signals are largely unknown. In this work, by using a  
393 lineage tracing line, cell culture, and a meniscus injury model, we demonstrated that Gli1  
394 is not only a mesenchymal progenitor marker in mouse meniscus but that Gli1-labeled  
395 cells directly contribute to meniscus development and injury response. Moreover, aging  
396 reduces this Gli1<sup>+</sup> progenitor population in healthy meniscus as well as their expansion

397 after injury, which is consistent with attenuated healing in old mice. On the therapeutic  
398 side, the activation of Hh/Gli1 signaling in adult meniscus leads to accelerated meniscus  
399 healing process and the delay of OA changes, indicating a protective role of Hh signaling  
400 on meniscus against degeneration.

401 Hh signaling plays a key role during embryonic development and tissue patterning. In  
402 long bones, embryonic Gli1<sup>+</sup> cells give rise to multiple cell types associated with the  
403 skeleton and are a major source of osteoblasts in both fetal and postnatal life of the mouse  
404 [10]. In another study, embryonic Gli1 lineage cells eventually become the entire mature  
405 entheses by which tendons attach to bone [32]. We also discovered that Gli1<sup>+</sup>  
406 mesenchymal progenitors from neonatal periarticular surfaces are capable of generating  
407 mesenchymal lineage cells, including osteoblasts, osteocytes, and adipocytes in the  
408 secondary ossification center of long bones [11]. Surprisingly, Gli1<sup>+</sup> cells do not  
409 contribute to the early development of meniscus. They start to appear from 2 weeks of  
410 age first in the anterior horn and later in the posterior horn. The different Gli1-labeling  
411 patterns in the two horns may reflect the distinct cellular composition of anterior and  
412 posterior horns reported previously [33]. Since menisci undergo rapid growth postnatally  
413 and Gli1<sup>+</sup> cells are absent from the meniscus body, our data indicated that there must be  
414 other distinct progenitor population(s) contributing to meniscus development. Indeed, we  
415 found that Gli1<sup>-</sup> meniscus cells are also able to proliferate and differentiation in vitro  
416 albeit with less activities compared to Gli1<sup>+</sup> cells.

417 At the adult stage, we found that Gli1<sup>+</sup> cells are mainly located at the superficial layer  
418 of meniscal horns. They rarely contribute to the inner cells of meniscus probably due to  
419 the low turnover of meniscus tissue. However, similar to their counterparts in the

420 periosteum [10] and tendon enthesis [32], they play a major role in tissue regeneration. In  
421 our study, we established a meniscus injury model by transection of the anterior horn. A  
422 previously reported mouse meniscus injury model (meniscectomy of the anterior horn)  
423 revealed almost complete regeneration of meniscus and only subtle cartilage degeneration  
424 at 6 weeks post surgery [34]. Compared to that, meniscus repair in our injury model is  
425 slow and inefficient with disconnected collagen fibers remaining at the injured site at 3  
426 months post surgery. This prolonged injury causes damage on articular cartilage, leading  
427 to moderate OA. Hence, our model is suitable to study the beneficial effects of Hh  
428 signaling on meniscus repair and meniscus damage-related OA progression.

429 Notably, we also observed a quick expansion of synovium enriched with Gli1<sup>+</sup> cells at  
430 the early stage of repair. Therefore, we cannot exclude the possibility that synovial Gli1<sup>+</sup>  
431 cells also contribute to meniscus regeneration. That said, our data showed that Gli1<sup>+</sup>  
432 primary meniscus cells injected into knee joints incorporate into meniscus tissue and  
433 accelerate repair, indicating that the endogenous Gli1<sup>+</sup> meniscus cells are likely  
434 responsible for the repair. In addition, we have not investigated the source of Hh protein  
435 in meniscus. Since Ihh from the prehypertrophic chondrocytes is known for regulating  
436 long bone development through endochondral ossification [35], it is possible that  
437 fibrochondrocytes in the deep layer of meniscus produce the Hh signals.

438 Our lineage tracing and injury studies are based on mouse models. However, rodents  
439 are different from human by having bony ossicles in the meniscus horns [36]. To show  
440 the clinical relevance of our research, we first demonstrated that porcine meniscus has  
441 similar anatomic distribution of Gli1<sup>+</sup> cells, suggesting a conservation of this patterning  
442 between species. While we did not detect Gli1<sup>+</sup> cells in healthy human meniscus, likely



443 due to the sample being collected from the body rather than the horns, we found similar  
444 expansion of Gli1<sup>+</sup> cells in cell clusters of diseased meniscus, suggesting the  
445 translatability of our findings. Our studies, therefore, have uncovered a critical role of  
446 Hh/Gli1 signaling in knee meniscus development and regeneration and provide evidence  
447 for targeting this pathway as a novel meniscus injury therapy and potentially for  
448 preventing OA development.

449

450 **Acknowledgments:** This study was supported by NIH grants NIH/NIAMS R01AR066098,  
451 R21AR074570 (to L.Q.), P30AR069619 (to Penn Center for Musculoskeletal Disorders),  
452 and NSF CMMI-1751898 (to LH). **Author contributions:** L.Q., H.S. and Y.W. designed  
453 the study. Y.W., H.S., T.G. performed animal experiments. L.Y., L.Z. and W.Y. did all the  
454 FACS sorting and flow cytometry analysis. Y.W., H.S., T.G., L.Y., L.Z. and W.Y. performed  
455 histology and imaging analysis. Y.W., H.S. and T.G. performed cell culture and qRT-PCR  
456 experiments. S.H. performed the meniscal differentiation experiment. L.H., E.K., F.L.,  
457 M.Z., R.M., S.X.L., Y.Z., and J.A. provided administrative, technical support and  
458 consultation. L.Q. and Y.W. wrote the manuscript. L.H., E.K., F.L., R.M., Y.W., S.H., T.G.,  
459 L.Y., L.Z., S.X.L., M.Z., Y.Z., W.Y., S.H. and J.A. reviewed and revised the manuscript.  
460 L.Q. approved the final version. **Competing interests:** None declared. **Data and materials**  
461 **availability:** All data associated with this study are present in the paper and available from  
462 the corresponding authors upon reasonable request.

463

## 464 **References**

465 1. Lohmander LS, Englund PM, Dahl LL and Roos EM. The long-term consequence of

- 466 anterior cruciate ligament and meniscus injuries: osteoarthritis. *Am J Sports Med.* 2007;  
467 35(10):1756-1769. .
- 468 2. Makris EA, Hadidi P and Athanasiou KA. The knee meniscus: structure-function,  
469 pathophysiology, current repair techniques, and prospects for regeneration. *Biomaterials.*  
470 2011; 32(30):7411-7431. .
- 471 3. Gui J, Zhang J and Huang H. Isolation and characterization of meniscus derived stem  
472 cells from rabbit as a possible treatment for damaged meniscus. *Curr Stem Cell Res Ther.*  
473 2015; 10(4):353-363.
- 474 4. Huang H, Wang S, Gui J and Shen H. A study to identify and characterize the  
475 stem/progenitor cell in rabbit meniscus. *Cytotechnology.* 2016; 68(5):2083-2103.
- 476 5. Segawa Y, Muneta T, Makino H, Nimura A, Mochizuki T, Ju YJ, et al.Sekiya I.  
477 Mesenchymal stem cells derived from synovium, meniscus, anterior cruciate ligament, and  
478 articular chondrocytes share similar gene expression profiles. *J Orthop Res.* 2009;  
479 27(4):435-441. doi: 410.1002/jor.20786.
- 480 6. Shen W, Chen J, Zhu T, Chen L, Zhang W, Fang Z, et al.Ouyang HW. Intra-articular  
481 injection of human meniscus stem/progenitor cells promotes meniscus regeneration and  
482 ameliorates osteoarthritis through stromal cell-derived factor-1/CXCR4-mediated homing.  
483 *Stem Cells Transl Med.* 2014; 3(3):387-394. .
- 484 7. Gamer LW, Shi RR, Gendelman A, Mathewson D, Gamer J and Rosen V. Identification  
485 and characterization of adult mouse meniscus stem/progenitor cells. *Connect Tissue Res.*  
486 2017; 58(3-4):238-245.
- 487 8. Seol D, Zhou C, Brouillette MJ, Song I, Yu Y, Choe HH, et al.Martin JA.  
488 Characteristics of meniscus progenitor cells migrated from injured meniscus. *J Orthop Res.*

489 2017; 35(9):1966-1972.

490 9. Petrova R and Joyner AL. Roles for Hedgehog signaling in adult organ homeostasis  
491 and repair. *Development*. 2014; 141(18):3445-3457.

492 10. Shi Y, He G, Lee WC, McKenzie JA, Silva MJ and Long F. Gli1 identifies osteogenic  
493 progenitors for bone formation and fracture repair. *Nat Commun*. 2017; 8(1):2043.

494 11. Tong W, Tower RJ, Chen C, Wang L, Zhong L, Wei Y, et al. Qin L. Periarticular  
495 Mesenchymal Progenitors Initiate and Contribute to Secondary Ossification Center  
496 Formation During Mouse Long Bone Development. *Stem Cells*. 2019; 37(5):677-689.

497 12. Wang L, Tower RJ, Chandra A, Yao L, Tong W, Xiong Z, et al. Qin L. Periosteal  
498 Mesenchymal Progenitor Dysfunction and Extraskelentially-Derived Fibrosis Contribute to  
499 Atrophic Fracture Nonunion. *J Bone Miner Res*. 2019; 34(3):520-532.

500 13. Jia H, Ma X, Tong W, Doyran B, Sun Z, Wang L, et al. Qin L. EGFR signaling is critical  
501 for maintaining the superficial layer of articular cartilage and preventing osteoarthritis  
502 initiation. *Proc Natl Acad Sci U S A*. 2016; 113(50):14360-14365.

503 14. Zhang X, Zhu J, Liu F, Li Y, Chandra A, Levin LS, et al. Qin L. Reduced EGFR  
504 signaling enhances cartilage destruction in a mouse osteoarthritis model. *Bone Research*.  
505 2014; 2:14015.

506 15. Pauli C, Grogan SP, Patil S, Otsuki S, Hasegawa A, Koziol J, et al. D'Lima DD.  
507 Macroscopic and histopathologic analysis of human knee menisci in aging and  
508 osteoarthritis. *Osteoarthritis Cartilage*. 2011; 19(9):1132-1141.

509 16. Ishida K, Kuroda R, Miwa M, Tabata Y, Hokugo A, Kawamoto T, et al. Kurosaka M.  
510 The regenerative effects of platelet-rich plasma on meniscal cells in vitro and its in vivo  
511 application with biodegradable gelatin hydrogel. *Tissue Eng*. 2007; 13(5):1103-1112.

- 512 17. Aigner T, Cook JL, Gerwin N, Glasson SS, Lavery S, Little CB, et al.Kraus VB.  
513 Histopathology atlas of animal model systems - overview of guiding principles.  
514 Osteoarthritis Cartilage. 2010; 18 Suppl 3:S2-6.
- 515 18. Baker BM, Nathan AS, Huffman GR and Mauck RL. Tissue engineering with  
516 meniscus cells derived from surgical debris. Osteoarthritis Cartilage. 2009; 17(3):336-345.  
517 doi: 10.1016/j.joca.2008.1008.1001. Epub 2008 Oct 1010.
- 518 19. Han WM, Heo SJ, Driscoll TP, Delucca JF, McLeod CM, Smith LJ, et al.Elliott DM.  
519 Microstructural heterogeneity directs micromechanics and mechanobiology in native and  
520 engineered fibrocartilage. Nat Mater. 2016; 15(4):477-484.
- 521 20. Moore N and Lyle S. Quiescent, slow-cycling stem cell populations in cancer: a review  
522 of the evidence and discussion of significance. J Oncol. 2011; 2011.:pii:396076.
- 523 21. Boxall SA and Jones E. Markers for characterization of bone marrow multipotential  
524 stromal cells. Stem Cells Int. 2012; 2012:975871.
- 525 22. Naylor AJ, Azzam E, Smith S, Croft A, Poyser C, Duffield JS, et al.Buckley CD. The  
526 mesenchymal stem cell marker CD248 (endosialin) is a negative regulator of bone  
527 formation in mice. Arthritis Rheum. 2012; 64(10):3334-3343.
- 528 23. Bagley RG, Weber W, Rouleau C, Yao M, Honma N, Kataoka S, et al.Teicher BA.  
529 Human mesenchymal stem cells from bone marrow express tumor endothelial and stromal  
530 markers. Int J Oncol. 2009; 34(3):619-627.
- 531 24. Lee SY, Niikura T and Reddi AH. Superficial zone protein (lubricin) in the different  
532 tissue compartments of the knee joint: modulation by transforming growth factor beta 1  
533 and interleukin-1 beta. Tissue Eng Part A. 2008; 14(11):1799-1808.
- 534 25. Dagklis A, Demeyer S, De Bie J, Radaelli E, Pauwels D, Degryse S, et al.Cools J.

- 535 Hedgehog pathway activation in T-cell acute lymphoblastic leukemia predicts response to  
536 SMO and GLI1 inhibitors. *Blood*. 2016; 128(23):2642-2654.
- 537 26. Wu X, Walker J, Zhang J, Ding S and Schultz PG. Purmorphamine induces  
538 osteogenesis by activation of the hedgehog signaling pathway. *Chem Biol*. 2004;  
539 11(9):1229-1238.
- 540 27. Lauth M, Bergstrom A, Shimokawa T and Toftgard R. Inhibition of GLI-mediated  
541 transcription and tumor cell growth by small-molecule antagonists. *Proc Natl Acad Sci U*  
542 *S A*. 2007; 104(20):8455-8460.
- 543 28. Srivastava RK, Kaylani SZ, Edrees N, Li C, Talwelkar SS, Xu J, et al. Athar M. GLI  
544 inhibitor GANT-61 diminishes embryonal and alveolar rhabdomyosarcoma growth by  
545 inhibiting Shh/AKT-mTOR axis. *Oncotarget*. 2014; 5(23):12151-12165.
- 546 29. Wang Y, Han C, Lu L, Magliato S and Wu T. Hedgehog signaling pathway regulates  
547 autophagy in human hepatocellular carcinoma cells. *Hepatology*. 2013; 58(3):995-1010.
- 548 30. Kurio N, Saunders C, Bechtold TE, Salhab I, Nah HD, Sinha S, et al. Koyama E. Roles  
549 of Ihh signaling in chondroprogenitor function in postnatal condylar cartilage. *Matrix Biol*.  
550 2018; 67:15-31.
- 551 31. Lin AC, Seeto BL, Bartoszko JM, Khoury MA, Whetstone H, Ho L, et al. Alman BA.  
552 Modulating hedgehog signaling can attenuate the severity of osteoarthritis. *Nature*  
553 *Medicine*. 2009; 15(12):1421-1425.
- 554 32. Schwartz AG, Long F and Thomopoulos S. Enthesis fibrocartilage cells originate from  
555 a population of Hedgehog-responsive cells modulated by the loading environment.  
556 *Development*. 2015; 142(1):196-206.
- 557 33. Gamer LW, Xiang L and Rosen V. Formation and maturation of the murine meniscus.

558 J Orthop Res. 2017; 35(8):1683-1689.

559 34. Hiyama K, Muneta T, Koga H, Sekiya I and Tsuji K. Meniscal regeneration after  
560 resection of the anterior half of the medial meniscus in mice. J Orthop Res. 2017;  
561 35(9):1958-1965.

562 35. Olsen BR, Reginato AM and Wang W. Bone development. Annu Rev Cell Dev Biol.  
563 2000; 16:191-220.

564 36. Shaw NE and Martin BF. Histological and histochemical studies on mammalian knee-  
565 joint tissues. J Anat. 1962; 96:359-373.

566

567

568

569

570

571

572

573

574

575

576

577

578

579

580

581 **Figures:**

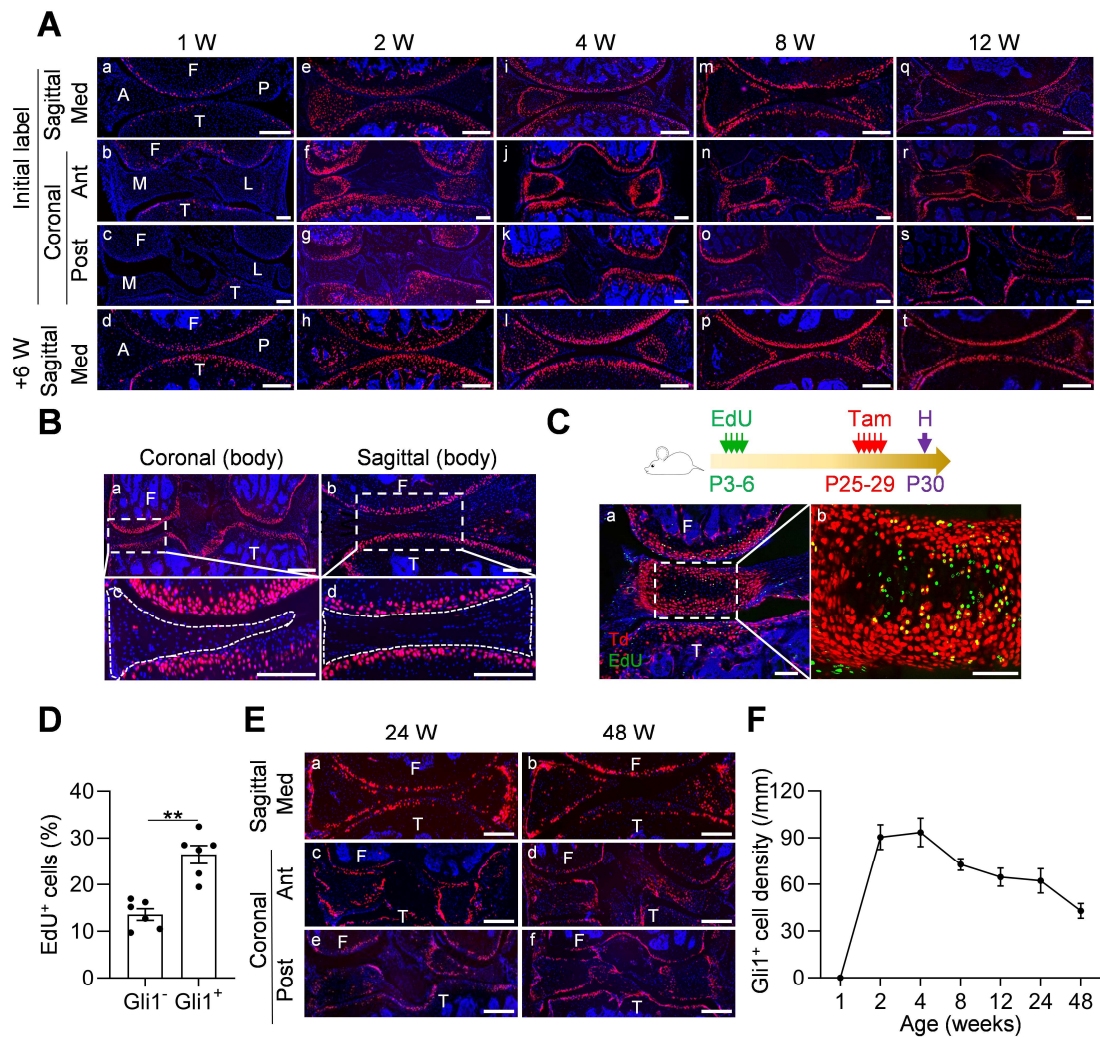

582

583 **Figure 1. Gli1 labels mesenchymal progenitors in mouse meniscus during**

584 **development.** (A) Representative fluorescence images of meniscus sections at indicated  
585 ages and sectioning sites. n = 3 mice/age/sectioning site. Scale bars, 200  $\mu$ m. F: femur; T:  
586 tibia; A: anterior; P: posterior; M: medial meniscus; L: lateral meniscus; Med: medial;  
587 Ant: anterior; Post: posterior; Red: Td; Blue: DAPI. (B) Representative fluorescence  
588 images of meniscus body at coronal (a) and sagittal (b) planes from 12-week-old  
589 *Gli1<sup>ER</sup>/Td* mice. Meniscus were harvested at 24 h after last Tam injection. n = 3



590 mice/sectioning site. Scale bars, 200  $\mu\text{m}$ . Boxed areas in a and b are shown at high  
591 magnification as c and d, respectively. Dashed lines outline meniscus. F: femur, T: tibia;  
592 Red: Td; Blue: DAPI. (C) Top panel is a schematic representation of the study protocol.  
593 *Gli1ER/Td* mice were injected with EdU at P3-6 and Tam at P25-29. Joints were  
594 harvested 24 h later. Representative confocal images of coronal sections of mouse knee  
595 joints are presented at the bottom panel. Boxed area in a (Scale bars, 200  $\mu\text{m}$ ) is shown at  
596 high magnification in b (Scale bars, 50  $\mu\text{m}$ ). F: femur, T: tibia; Red: Td; Blue: DAPI;  
597 Green: EdU. (D) The percentage of EdU<sup>+</sup> cells within Gli1<sup>+</sup> or Gli1<sup>-</sup> meniscus cells were  
598 quantified. n = 6 mice/group. (E) *Gli1ER/Td* mice were treated with Tam at 24 or 48  
599 weeks of age and analyzed 24 h later. Representative fluorescence images of sagittal (a,  
600 b) and coronal (c-f) sections of knee joints are presented. Scale bars, 200  $\mu\text{m}$ . F: femur, T:  
601 tibia; Red: Td; Blue: DAPI. (F) The density of Gli1<sup>+</sup> cells along meniscus surface was  
602 measured in mice at different ages. n = 5 mice/age. Statistical analysis was performed  
603 using unpaired two-tailed t-test. Data presented as mean  $\pm$  s.e.m. \*\*p < 0.01.



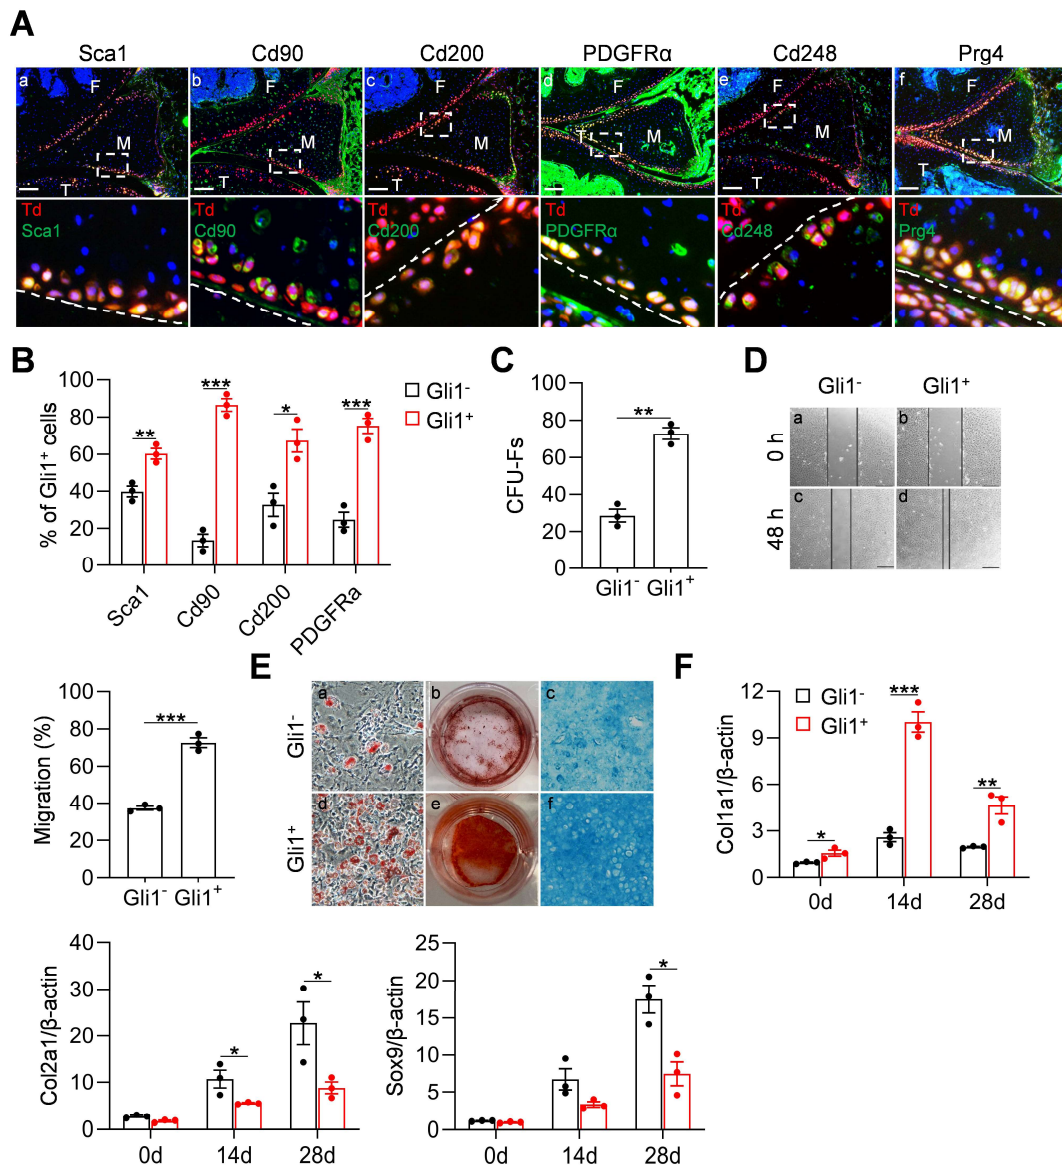

604

605 **Figure 2. Gli1-labeled meniscus cells possess mesenchymal progenitor properties.**

606 (A) Representative immunofluorescence images of Sca1, Cd90, Cd200, PDGFR $\alpha$ , Cd248

607 and Prg4 in 3-month-old *Gli1ER/Td* meniscus. Scale bars, 200  $\mu$ m. Boxed areas are

608 shown at high magnification in corresponding panels to the bottom. Dashed lines indicate

609 the surface of meniscus. Yellow cells are double positive for progenitor marker and Td.

610 Blue: DAPI; F: femur; T: tibia; M: meniscus. (B) Quantification of the expression level

611 of mesenchymal progenitor markers in Gli1<sup>+</sup> and Gli1<sup>-</sup> cells from meniscus. Digested

612 meniscus cells from 3-month-old *Gli1<sup>ER</sup>/Td* mice were subjected to flow cytometry  
613 analysis. n = 3 independent experiments. (C) CFU-F assay of Gli1<sup>+</sup> and Gli1<sup>-</sup> cells sorted  
614 by FACS from digested meniscus cells. n = 3 independent experiments. (D)  
615 Representative bright-field images of the scratch-wound closure in Gli1<sup>+</sup> or Gli1<sup>-</sup>  
616 meniscus cells. Scale bars, 200  $\mu$ m. Solid lines indicate the remaining area not covered by  
617 meniscus cells. The relative migration rate was measured by the percentage of scratched  
618 area being covered by migrated cells at 48 h. n = 3 independent experiments. (E)  
619 Representative adipogenic (AD), osteogenic (OB), and chondrogenic (CH) differentiation  
620 images of Gli1<sup>+</sup> and Gli1<sup>-</sup> cells. Cells were stained by Oil Red, Alizarin red, and Alcian  
621 blue, respectively. (F) qRT-PCR analysis of *Col1a1*, *Col2a1* and *Sox9* mRNA in Gli1<sup>+</sup>  
622 and Gli1<sup>-</sup> cells at day 0, 14, and 28 of meniscal differentiation. n = 3 independent  
623 experiments. Statistical analysis was performed using unpaired two-tailed t-test. Data  
624 presented as mean  $\pm$  s.e.m. \*p < 0.05, \*\*p < 0.01, \*\*\*p < 0.001.

625

626

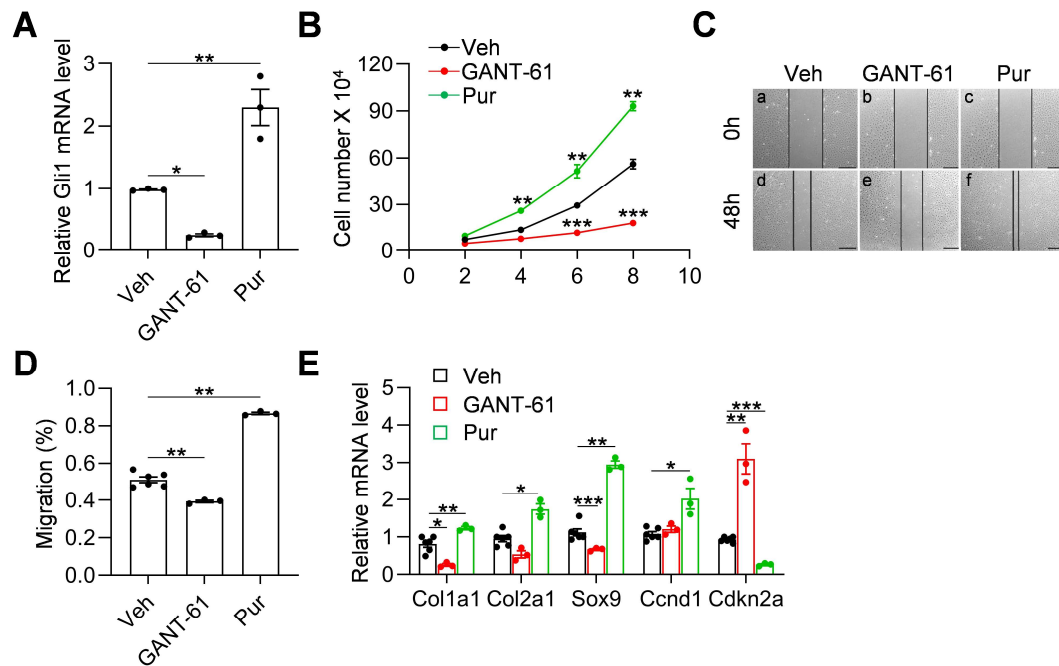

627

628 **Figure 3. Hh signaling stimulates proliferation and migration of meniscus**

629 **progenitors.** (A) qRT-PCR analysis of Gli1 mRNA in primary mouse meniscus cells

630 treated with vehicle, GANT-61 or purmorphamine (Pur) for 48 h. n = 3 independent

631 experiments. (B) The proliferative ability of primary mouse meniscus cells was up-

632 regulated by purmorphamine and down-regulated by GANT-61 over 8 days of culture. n

633 = 3 independent experiments. (C) Representative bright-field images of the scratch-

634 wound closure in meniscus cells treated with veh, GANT-61 or purmorphamine. Scale

635 bars, 200  $\mu$ m. Solid lines indicate the remaining area not covered by meniscus cells. (D)

636 The relative migration rate was measured. n = 3-6 independent experiments. (E) qRT-

637 PCR analysis of marker genes in meniscus cells undergoing meniscal differentiation in

638 the presence or absence of GANT-61 and purmorphamine. n = 3-6 independent

639 experiments. Statistical analysis was performed using one-way ANOVA with Dunnett's

640 post hoc test. Data presented as mean  $\pm$  s.e.m. \*p < 0.05, \*\*p < 0.01, \*\*\*p < 0.001.

641

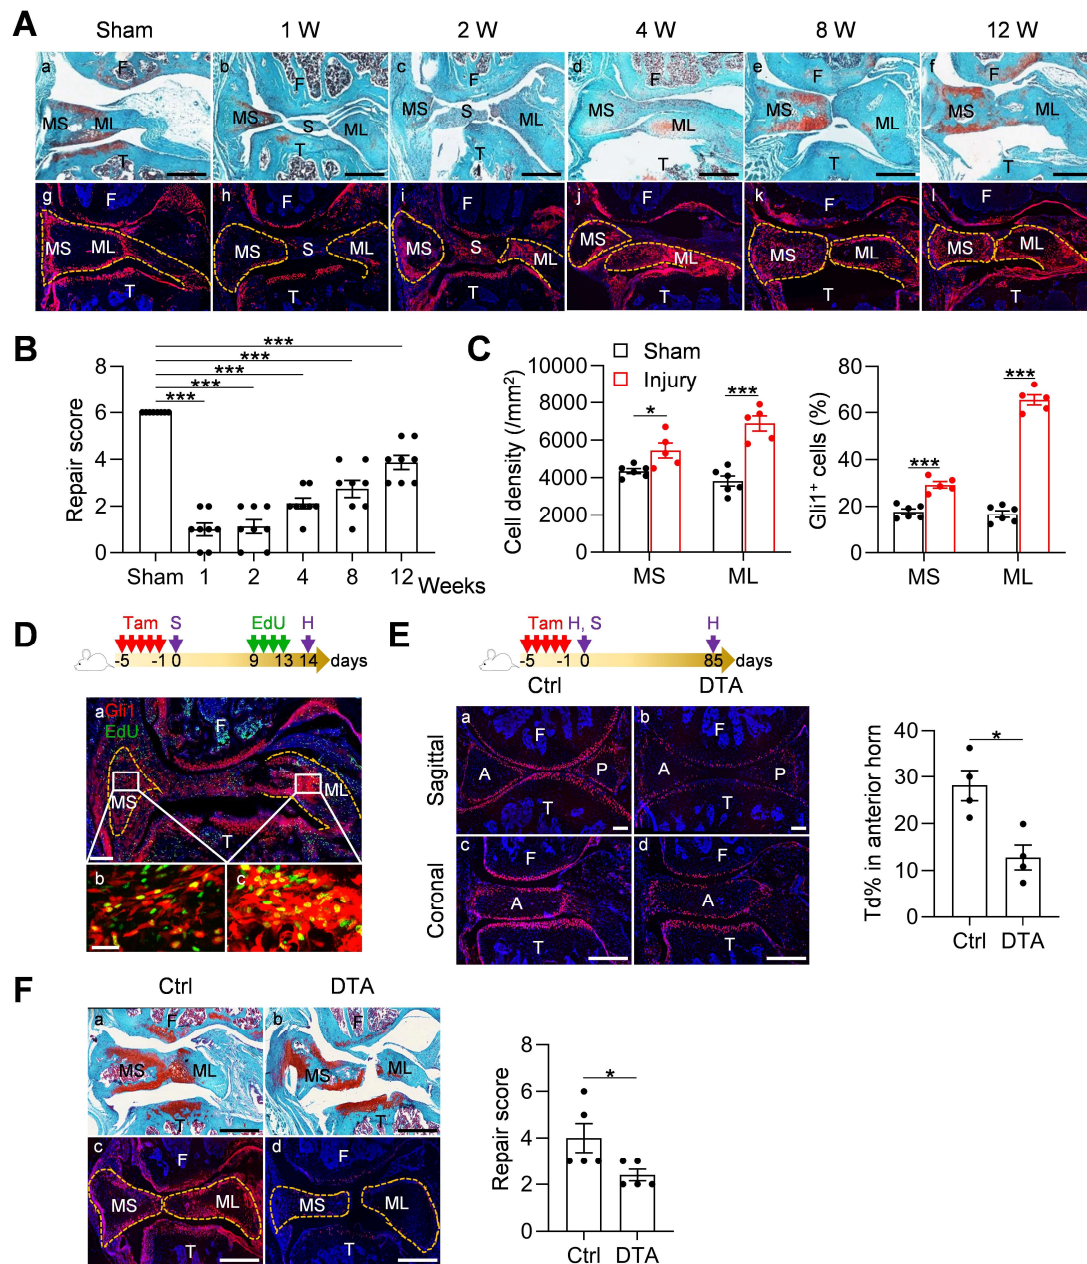

642

643 **Figure 4. Meniscus injury rapidly expands Gli1-labeled cells.** (A) Representative  
 644 safranin O/fast green staining (top) and fluorescence images (bottom) of oblique sections  
 645 of mouse knee joints harvested at indicated time points after injury. Dashed lines outline  
 646 the meniscus. Scale bars, 200  $\mu$ m. F: femur; T: tibia; S: synovium; MS: meniscus  
 647 synovial end; ML: meniscus ligamental end; Red: Td; Blue: DAPI. (B) Repair score was

648 evaluated at indicated time points after meniscus injury. n = 8 mice/group. (C) Cell  
649 density in the synovial and ligamental ends of meniscus was quantified at 4 weeks post  
650 meniscus injury. n = 5-6 mice/group. The percentage of Gli1<sup>+</sup> cells in the synovial and  
651 ligamental ends of meniscus was quantified at 4 weeks post meniscus injury. n = 5-6  
652 mice/group. (D) Top panel is a schematic representation of the study protocol. *Gli1ER/Td*  
653 mice were treated with Tam and meniscus injury at 12 weeks of age (day 0) followed by  
654 EdU injections at day 9-13 and analyzed at 24 h after the last EdU dosing. A  
655 representative confocal image of knee joint is shown below (Scale bars, 250 μm). Boxed  
656 areas of synovial and ligamental ends of meniscus (MS and ML, respectively) are shown  
657 at high magnification at the bottom (Scale bar, 25 μm). F: femur; T: tibia; Red: Td; Blue:  
658 DAPI; Green: EdU. (E) Top panel is a schematic representation of the study protocol.  
659 *Gli1ER/Td* (Ctrl) or *Gli1ER/Td/DTA* (DTA) mice received Tam injections at 12 weeks of  
660 age (day 0). Non-injured knee joints were harvested at 24h after the last Tam dosing (day  
661 1). Injured knee joints received meniscus surgery at 24h after the last Tam dosing (day 1)  
662 and were harvested 3 months later. A representative fluorescent images of sagittal and  
663 coronal mouse knee joint sections at 12 weeks of age are shown below (Scale bars, 200  
664 μm). F: femur; T: tibia; A: anterior; P: posterior; Red: Td; Blue: DAPI. Td<sup>+</sup> cell  
665 percentage in the anterior horn was quantified based on the sagittal images. n = 4  
666 mice/group. (F) Representative safranin O/fast green staining (top) and fluorescence  
667 images (bottom) of oblique sections of mouse knee joints harvested at 12 weeks after  
668 injury. Dashed lines outline the meniscus. Scale bars, 200 μm. F: femur; T: tibia; S:  
669 synovium; MS: meniscus synovial end; ML: meniscus ligamental end; Red: Td; Blue:  
670 DAPI. Repair score was evaluated. n = 5 mice/group. Statistical analysis was performed



671 using one-way ANOVA with Dunnett's post hoc test for (B) and unpaired two-tailed t-test  
 672 for (C), (E) and (F). Data presented as mean  $\pm$  s.e.m. \* $p < 0.05$ , \*\*\* $p < 0.001$ .  
 673

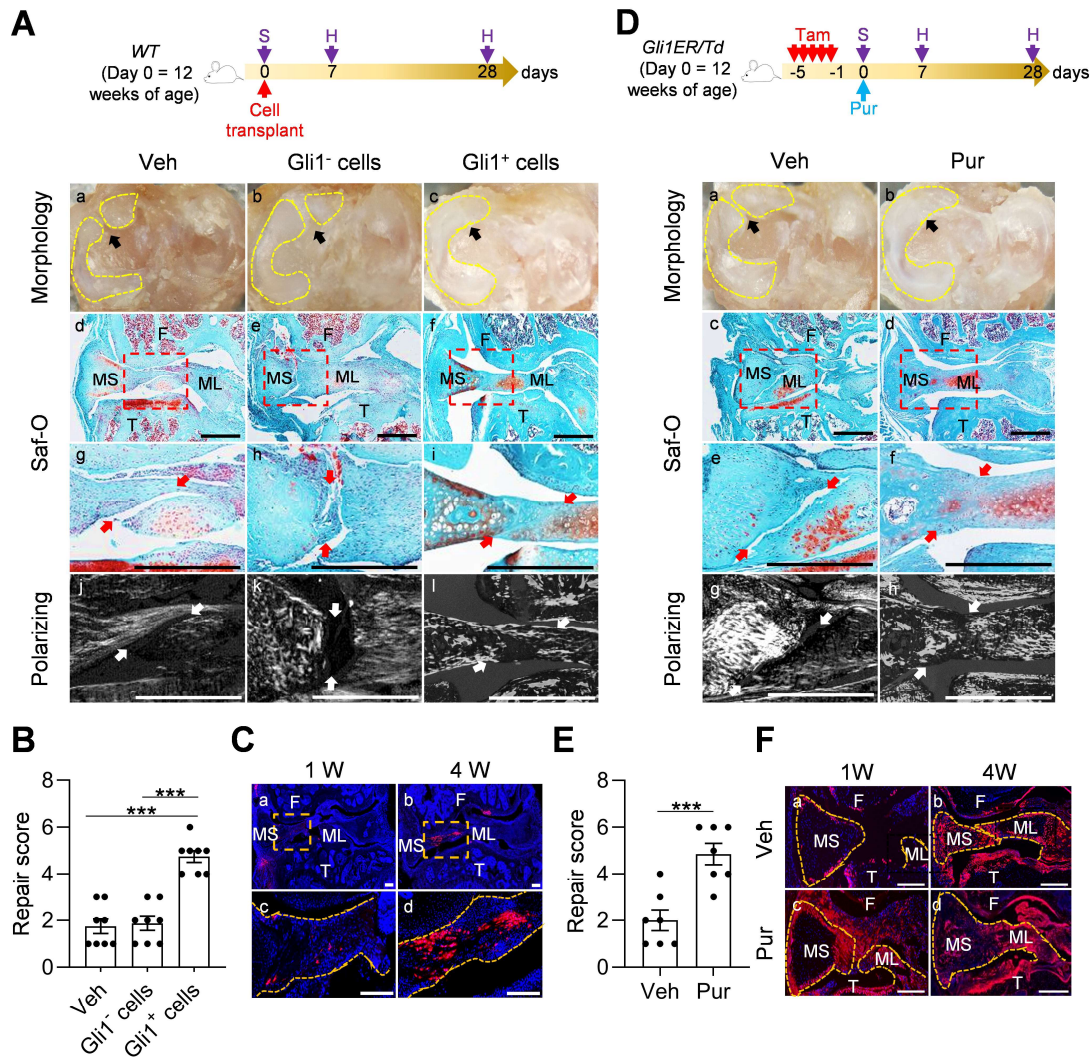

674  
 675 **Figure 5. Activation of Hh/Gli1 pathway accelerates mouse meniscus repair. (A)**  
 676 Schematic representation of the study protocol. *WT* mice received meniscus injury at 12  
 677 weeks of age followed by transplantation of 10,000 Gli1<sup>+</sup> or Gli1<sup>-</sup> meniscus cells at the  
 678 injury site. Knee joints were harvested at 1 and 4 weeks after injury. Representative  
 679 overview, safranin O/fast green staining, and polarizing images of mouse knee joints at 4

680 weeks after injury. Yellow dashed lines in a, e, and i outline the overview morphology of  
681 injured meniscus. Meniscus is shown attached to tibial plateau. Arrows point to the injury  
682 site. Red boxed areas in b, f, and j are shown at high magnification in c, g, and k,  
683 respectively. Scale bars, 200  $\mu\text{m}$ . F: femur; T: tibia; MS: meniscus synovial end; ML:  
684 meniscus ligamental end. **(B)** Repair score was evaluated. n = 8 mice/group. **(C)**  
685 Representative confocal images of mouse knee joints at 1 and 4 weeks after injury and  
686 injection of  $\text{Gli1}^+$  cells. Boxed areas in the top panel are shown at a high magnification in  
687 the bottom panel. Dashed line outlines meniscus. Scale bars, 200  $\mu\text{m}$ . F: femur; T: tibia;  
688 MS: meniscus synovial end; ML: meniscus ligamental end; Blue: DAPI, Red: Td. **(D)**  
689 Schematic representation of the study protocol. *Gli1ER/Td* mice received Tam injections  
690 and meniscus injury at 12 weeks of age (day 0) followed by vehicle and purmorphamine  
691 (pur) injection. Knee joints were harvested at 1 and 4 weeks after injury. Representative  
692 overview, safranin O/fast green staining, and polarizing images of mouse knee joints at 4  
693 weeks after injury. Yellow dashed lines in a and e outline the overview morphology of  
694 injured meniscus. Meniscus is shown attached to tibial plateau. Red boxed areas in b and  
695 f are shown at a high magnification in c and g, respectively. Arrows point to the injury  
696 site. Scale bars, 200  $\mu\text{m}$ . F: femur; T: tibia; MS: meniscus synovial end; ML: meniscus  
697 ligamental end. **(E)** Repair score was evaluated. n = 7 mice/group. **(F)** Representative  
698 fluorescence images of vehicle- and purmorphamine-treated mouse meniscus at 1 and 4  
699 weeks after injury. Scale bars, 200  $\mu\text{m}$ . F: femur; T: tibia; MS: meniscus synovial end;  
700 ML: meniscus ligamental end; Blue: DAPI, Red: Td. Statistical analysis was performed  
701 using one-way ANOVA with Turkey's post hoc test for **(B)** and unpaired two-tailed t-test  
702 for **(E)**. Data presented as mean  $\pm$  s.e.m. \*\*\*p < 0.001.

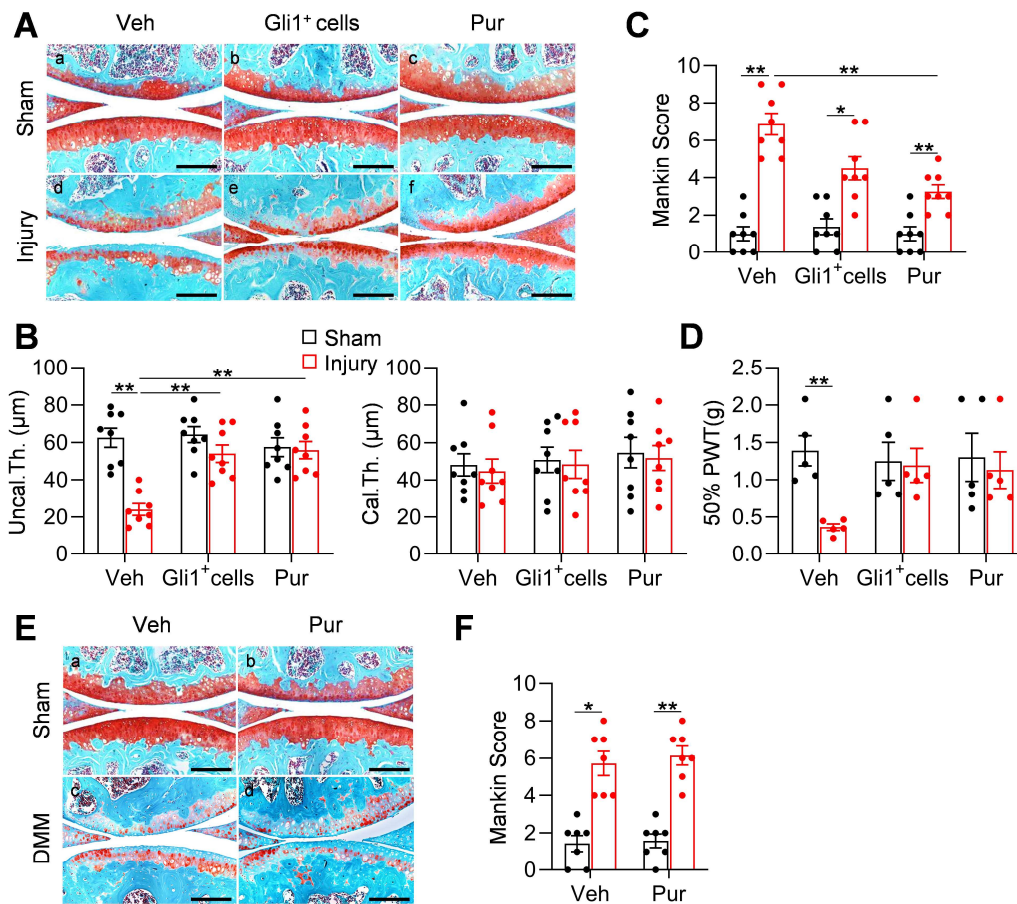

703

704 **Figure 6. Meniscus repair by enhancing Hh/Gli1 signaling delays OA progression.**

705 (A) Representative safranin O/fast green staining of sagittal sections of vehicle-, Gli1<sup>+</sup>  
 706 cell- and purmorphamine (pur)-treated mouse knee joints at 8 weeks after sham or

707 meniscus injury. Scale bars, 200 μm. (B) Average thickness of uncalcified zone

708 (Uncal.Th.), calcified zone (Cal.Th.) of the tibial articular cartilage was quantified. n = 8

709 mice/group. (C) The OA severity was measured by Mankin score. n = 8 mice/group. (D)

710 von Frey assay was performed at 8 weeks after injury. PWT: paw withdrawal threshold. n

711 = 5 mice/group. (E) Representative safranin O/fast green staining of sagittal sections of

712 vehicle- and purmorphamine-treated mouse knee joints at 8 weeks after sham or DMM

713 surgery. Scale bars, 200 μm. (F) The OA severity was measured by Mankin score. n = 7



714 mice/group. Statistical analysis was performed using two-way ANOVA with Turkey's  
715 post hoc test. Data presented as mean  $\pm$  s.e.m. \* $p < 0.05$ , \*\* $p < 0.01$ , \*\*\* $p < 0.001$ .

716

717 **Supplementary figures:**

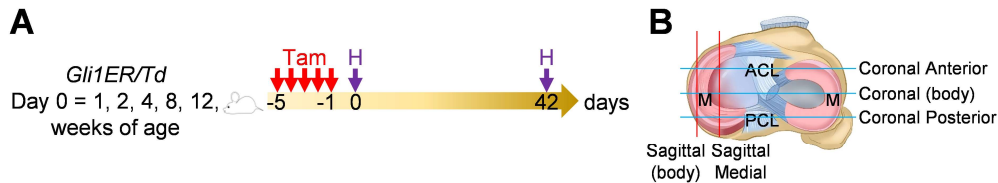

718

719 **Fig. S1. Schematic graph of the study protocol.** (A) Male *Gli1ER/Td* mice were treated  
720 with Tam at 1, 2, 4, 8 and 12 weeks of age and analyzed at 24 h (pulse) or 6 weeks  
721 (tracing) after the last Tam dosing. (B) Schematic cartoon of meniscus shows sectioning  
722 sites. M: meniscus; ACL: anterior cruciate ligament; PCL: posterior cruciate ligament.

723

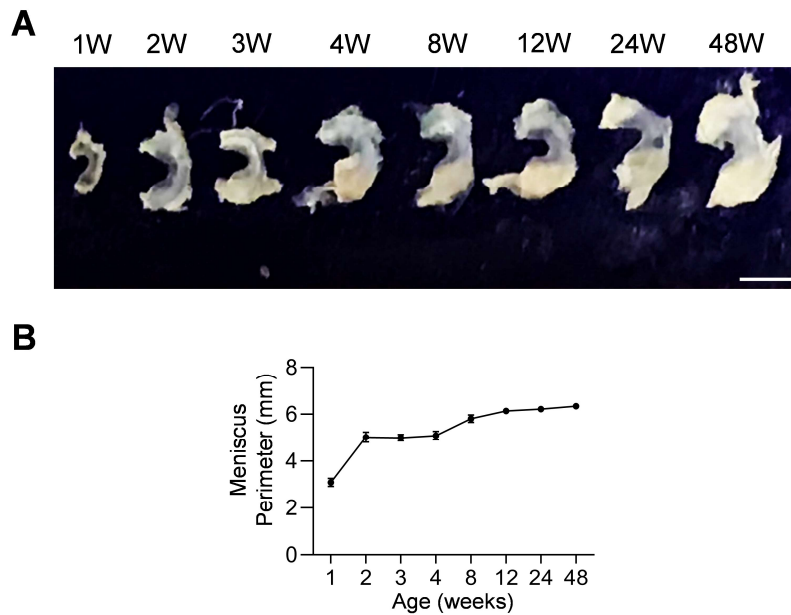

724

725 **Fig. S2. Mouse meniscal morphogenesis during development.** (A) The morphological  
726 overview of meniscus at 1, 2, 3, 4, 8, 12, 24, 48 weeks of age. Scale bars, 1mm. (B) The  
727 meniscal perimeter was quantified.  $n = 3$  mice/age.

728

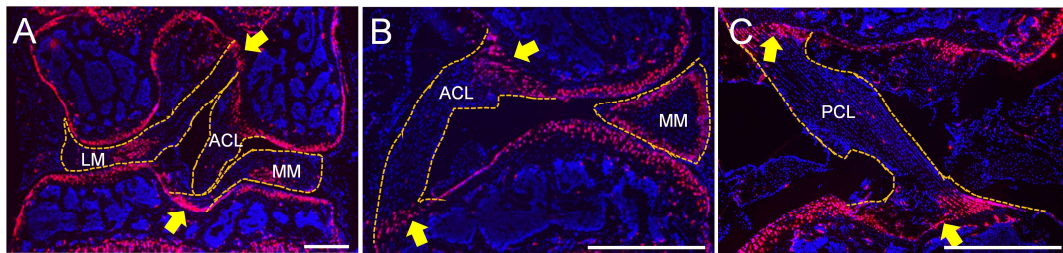

729

730 **Fig. S3. Meniscal entheses and ligamentous entheses regions in joint are enriched with**

731 **Gli1<sup>+</sup> cells.** *Gli1<sup>ER</sup>/Td* mice at 12 weeks of age received Tam injections followed by  
732 tissue harvest 24 h later. Knees were sectioned to show meniscal entheses regions (A) and  
733 ligamentous entheses regions (B) and (C) within the knee joint. MM: medial meniscus;  
734 LM: lateral meniscus; ACL: anterior cruciate ligament; PCL: posterior cruciate ligament.  
735 Yellow arrows indicate the entheses regions.

736

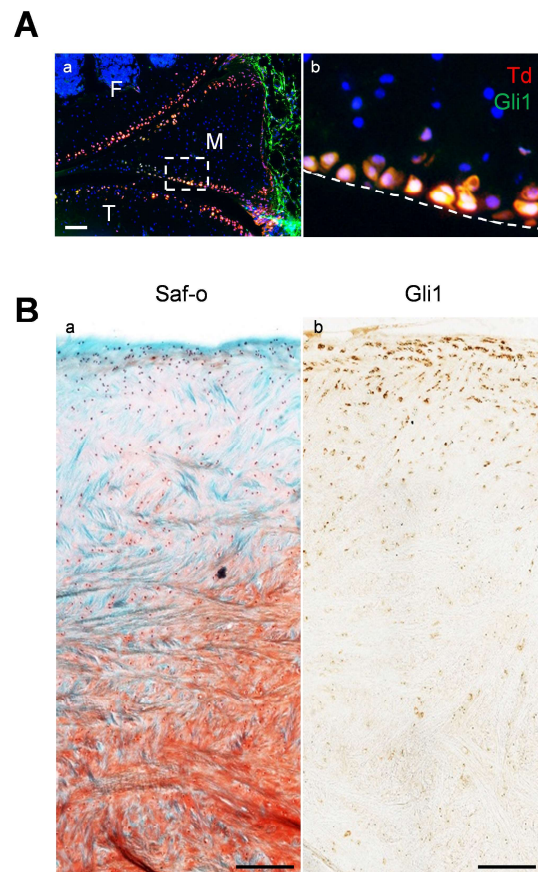

737

738 **Fig. S4. Gli1 labels the superficial zone cells of mouse and mini-pig meniscal horns.**

739 (A) Immunofluorescence staining of Gli1 (green) on sagittal sections of 12-week-old

740 *Gli1ER/Td* mouse knee joints. Boxed area in a is enlarged in b. Dashed line indicates the  
 741 surface of meniscus. Scale bars, 200  $\mu$ m. F: femur; T: tibia; M: meniscus. **(B)**  
 742 Representative safranin O/fast green staining (left) and immunohistochemistry staining of  
 743 Gli1 (right) in the horn area of mini-pig meniscus. Scale bars, 200  $\mu$ m.  
 744

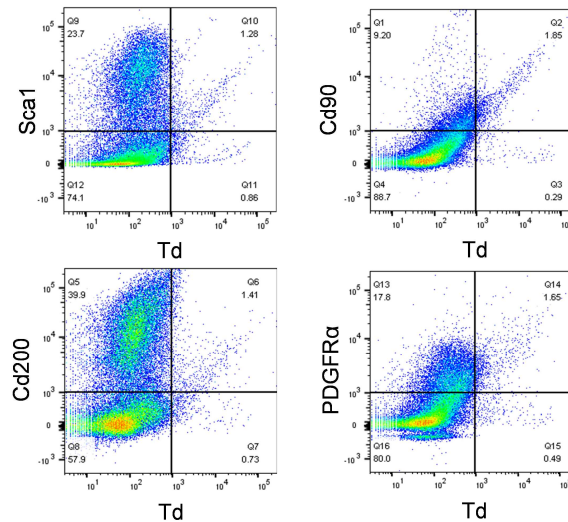

745  
 746 **Fig. S5. Mesenchymal progenitor markers are enriched in Gli1<sup>+</sup> meniscus cells.**  
 747 Digested meniscus cells from 3-month-old Gli1ER/Td mice were subjected to flow  
 748 cytometry analysis.  
 749

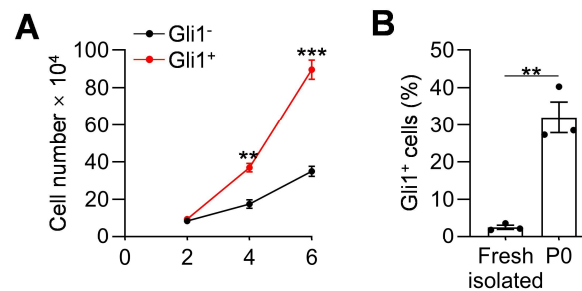

750  
 751 **Fig. S6. Gli1<sup>+</sup> cells proliferate faster than Gli1<sup>-</sup> cells.** (A) Sorted Gli1<sup>+</sup> meniscus cells  
 752 proliferate faster than Gli1<sup>-</sup> cells. Cells were seeded at 10,000/well on day 0 and counted  
 753 every other day. n = 3 independent experiments. (B) The percentage of Td (Gli1)<sup>+</sup> cells  
 754 from freshly isolated cells and after a 7-day culture was quantified by flow cytometry. n =  
 755 3 independent experiments. Statistical analysis was performed using unpaired two-tailed  
 756 t-test. Data presented as mean  $\pm$  s.e.m. \*\*p < 0.01, \*\*\*p < 0.001.

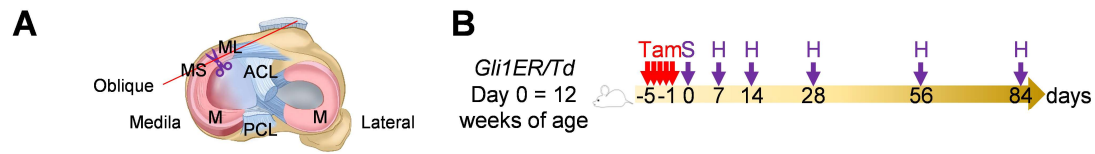

757

758 **Fig. S7. Schematic graph of the study protocol.** (A) Schematic cartoon of meniscus

759 shows the sectioning site. M: meniscus; MS: meniscus synovial end; ML: meniscus

760 ligamental end. A pair of scissors indicates the transection site. ACL: anterior cruciate

761 ligament; PCL: posterior cruciate ligament. (B) Male *Gli1ER/Td* mice received Tam

762 injections (day -5 ~ -1) and meniscus injury (day 0) at 12 weeks of age. Knee joints were

763 harvested at 1, 2, 4, 8, 12 weeks after injury.

764

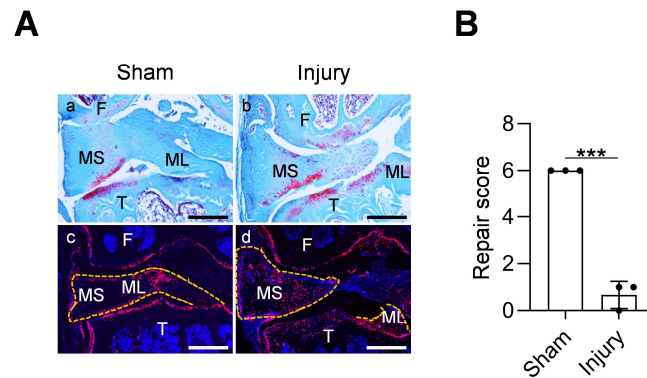

765

766 **Fig. S8. Aging diminishes *Gli1*<sup>+</sup> cell expansion and the repair ability of meniscus.**

767 (A) Representative safranin O/fast green staining (top) and fluorescence images (bottom)

768 of aged mouse knee joints at 4 weeks after sham or meniscus injury. *Gli1ER/Td* mice at

769 12 months of age received Tam followed by meniscus injury. Dashed lines outline the

770 meniscus. Scale bars, 200  $\mu$ m. F: femur; T: tibia; MS: meniscus synovial end; ML:

771 meniscus ligamental end; Red: Td; Blue: DAPI. (B) Repair score was quantified. n = 3

772 mice/group. Statistical analysis was performed using unpaired two-tailed t-test. Data

773 presented as mean  $\pm$  s.e.m. \*\*\*p < 0.001.

774

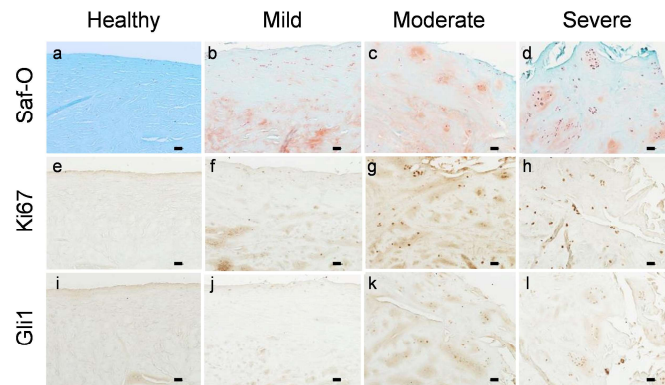

775

776 **Fig. S9. Gli1<sup>+</sup> cells appear in proliferative cell clusters of degenerated human**  
 777 **meniscus.** Representative safranin O/fast green staining (top) and immunohistochemistry  
 778 staining of Ki67 (middle) and Gli1 (bottom) in human meniscus tissues at different  
 779 degenerative stages. n = 3 samples/stage. Scale bars, 200  $\mu$ m.

780

781 **Table S1. Mouse real-time PCR primer sequences.**

| Gene                            | Forward primer               | Reverse primer               |
|---------------------------------|------------------------------|------------------------------|
| <i>Coll1a1</i>                  | 5'- ACGTCTGGTTTGGAGAGA -3'   | 5'- AGGAAGGTCAGCTGGATAG -3'  |
| <i>Col2a1</i>                   | 5'-CAAGAACAGCAACGAGTACCG-3'  | 5'-GTCACTGGTCAACTCCAGCAC-3'  |
| <i>Sox9</i>                     | 5'- AGGAGAGCGAGGAAGATAAG-3'  | 5'- ACGTGTGGCTTGTTCTTG -3'   |
| <i>Ccnd1</i>                    | 5'- CTGACACCAATCTCCTCAAC -3' | 5'- GCATGGATGGCACAATCT -3'   |
| <i>Cdkn2a</i>                   | 5'- TGGGTGCTCTTTGTGTTC -3'   | 5'- GCTCTGCTCTTGGGATTG -3'   |
| <i>Gli1</i>                     | 5'- CCACCCTACCTCTGTCTATT -3' | 5'- CCATTGCCCATCACAGAA -3'   |
| <i><math>\beta</math>-actin</i> | 5'-TCCTCCTGAGCGCAAGTACTCT-3' | 5'-CGGACTCATCGTACTCCTGCTT-3' |

782
